# Supplementary material for: Non‐invasive, ratiometric determination of intracellular pH in Pseudomonas species using a novel genetically encoded indicator
Source: PubMed Central journal article supplement (PMC6559197; doi:10.1111/1751-7915.13439), 2019-06-04
Supplement: MBT2-12-799-s001.pdf [file MBT2-12-799-s001.pdf]

## Supporting Information

### Non-invasive, ratiometric determination of intracellular pH in *Pseudomonas* species using a novel genetically-encoded indicator

by

Alejandro Arce-Rodríguez, Daniel C. Volke, Sarina Bense,  
Susanne Häussler, and Pablo I. Nickel

#### Sequence S1 · Synthetic DNA encoding the PHP indicator.

```
aagcttAGGAGGAAAAACATATGAGCAAAGGTGAAGAATTGTTACCCGGTGTGGTGCCA  
ATTTTGGTTCGAAaCTCGATGGGGATGTGAACGGCCATAAGTTCTCGGTGAGCGGCGAAGG  
GGAAGGGGATGCCACCTATGGCAAACCTCACGCTCAAATTTATTTGCACCACCGGCAAGT  
TGCCTGTCCCCTGGCCAACGCTGGTCACCACGTTGTCGTATGGTGTCCAATGCTTTTCC  
CGGTATCCTGATCACATGAAACAACATGACTTTTTTAAAAGCGCGATGCCGGAAGGGTA  
TGTGCAGGAGCGGACGATTTTTTTTAAGGACGACGGGAATTACAAGACGCGGGCAGAGG  
TGAAGTTTGAAGGTGACACGTTGGTGAACCGTATTGAGTTGAAGGGTATCGACTTCAAG  
GAAGATGGGAACATCCTCGGTCACAACTGGAATATAATTACAACGAGCACCTCGTCTA  
CATTATGGCGGACAAACAAAAAATGGCACGAAAGCGATTTTCCAAGTCCACCATAACA  
TTGAAGATGGGTCCGTCCAACCTCGCCGACCATTACCAACAGAATACCCCAATCGGCGAT  
GGGCCGGTGCTGCTCCAGACAACCACTATCTCCATACGCAATCGGCGCTGTCCAAGGA  
cCCGAATGAAAAACGTGATCATATGGTGCTGCTGGAGTTCGTCACCGCGGCTGGTATCA  
CCCACGGTATGGATGAaCTCTACAAGTAAactagt
```

The individual *Hind*III and *Spe*I restriction targets are underlined at the beginning and by the end of the sequence, respectively. The coding sequence of the PHP indicator is highlighted in green, the *START* and *STOP* codons are indicated in boldface, and the synthetic ribosome binding site is shown in red.

**Fig. S1 · Calibration curves for *E. coli* and *P. putida* carrying the PHP indicator in a complex culture medium.**

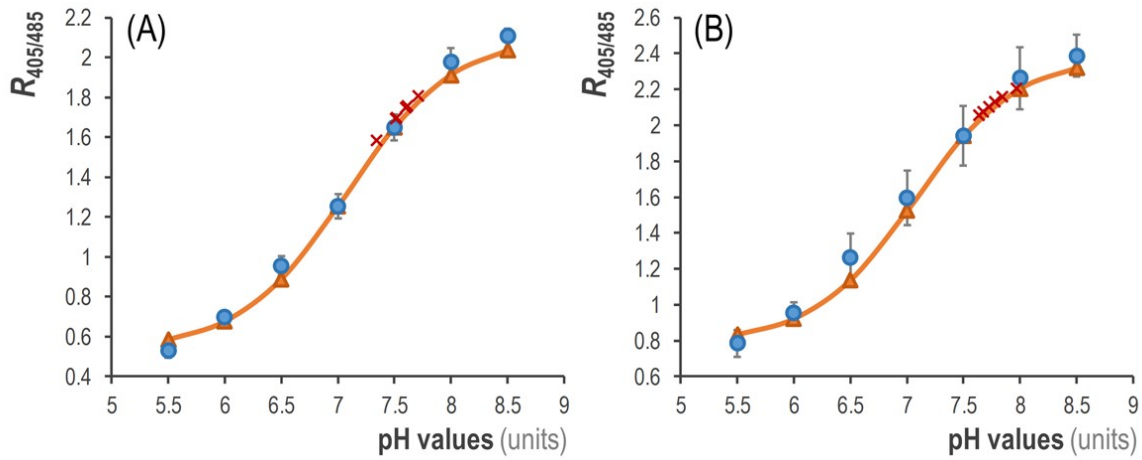

Separate calibration curves for intracellular pH values were calculated by means of the PHP-dependent fluorescence in *E. coli* DH5 $\alpha$  (A) and *P. putida* KT2440 (B) transformed with plasmid pS2513-*PHP* and grown in LB medium at 30°C or 37°C, respectively. The data for the calibration curve was obtained as the ratio between the excitation peaks at  $\lambda_{\text{excitation}} = 405$  nm and 485 nm ( $R_{405/485}$ ) plotted against the pH values of equilibrated cells (blue circles). These values were fitted using the Boltzmann sigmoid best-fitting curve to obtain the calibration curve (orange triangles), which was used to calculate the actual pH<sub>i</sub> values in either strain during exponential growth (red crosses). Data points are representative of independent triplicates (mean values and standard deviation), and the red crosses (corresponding to six individual determinations), are shown in the curve to indicate the narrow dispersion of experimentally-calculated pH<sub>i</sub> values.

**Fig. S2 · Calibration curve for *P. putida* carrying the PHP indicator in a minimal culture medium.** A calibration curve for intracellular pH values was calculated by means of the PHP-dependent fluorescence in *P. putida* KT2440 carrying plasmid pS2513-*PHP* and grown in M9 minimal medium containing 20 mM glucose at 30°C. The data for the calibration curve was obtained as the ratio between the excitation peaks at  $\lambda_{\text{excitation}} = 405$  nm and 485 nm ( $R_{405/485}$ ) plotted against the pH values of equilibrated cells (blue circles).

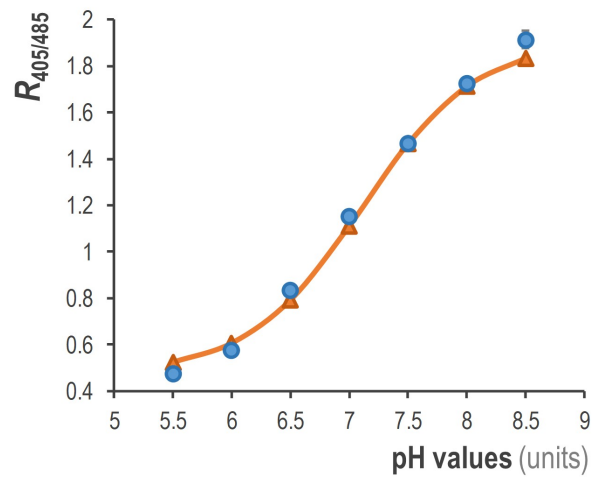

These values were fitted using the Boltzmann sigmoid best-fitting curve to obtain the calibration curve (orange triangles), which was used to calculate the actual  $\text{pH}_i$  values in either strain during exponential growth. Data points are representative of independent triplicates (mean values and standard deviation).

**Table S1.** Intracellular pH assessment of *P. putida* KT2440 and mutants in glycolytic genes in glucose cultures.

| Bacterial strain                     | pH values during  |               |                  |               |
|--------------------------------------|-------------------|---------------|------------------|---------------|
|                                      | Exponential phase |               | Stationary phase |               |
|                                      | Cytoplasmic       | Extracellular | Cytoplasmic      | Extracellular |
| <i>P. putida</i> KT2440              | 7.66 ± 0.09       | 6.35 ± 0.01   | 8.01 ± 0.12      | 6.84 ± 0.01   |
| <i>P. putida</i> $\Delta$ <i>glk</i> | 7.72 ± 0.09       | 6.05 ± 0.01   | 8.09 ± 0.14      | 6.45 ± 0.01   |
| <i>P. putida</i> $\Delta$ <i>gcd</i> | 7.59 ± 0.06       | 7.03 ± 0.01   | 7.63 ± 0.04      | 7.04 ± 0.01   |

All strains, carrying plasmid pS2513-*PHP*, were grown in M9 minimal medium containing 20 mM glucose, and the cytoplasmic pH was determined both during exponential growth and in the stationary phase (i.e. 24 h post-inoculation of the cultures). The pH of the culture medium was likewise measured in culture supernatants from the same samples used for cytoplasmic pH determinations. These results represent the mean value of each parameter  $\pm$  standard deviation of triplicate measurements from at least three independent experiments.
